# Supplementary material for: Near-infrared luminescent CaTiO3:Nd3+ nanofibers with tunable and trackable drug release kinetics
Source: Royal Society of Chemistry journal article supplement (doi:10.1039/c5tb01158b), 2015-01-01
Supplement: c5tb01158b1.pdf [file c5tb01158b1.pdf]

## Supporting Information

### Near-Infrared Luminescent CaTiO<sub>3</sub>: Nd<sup>3+</sup> Nanofibers with Trackable Drug

#### Release Kinetics

*Xiang Li<sup>1,\*</sup>, Qihong Zhang<sup>1</sup>, Zeeshan Ahmad<sup>2</sup>, Jie Huang<sup>3</sup>, Zhaohui Ren<sup>1</sup>, Wenjian Weng<sup>1</sup>,  
Gaorong Han<sup>1,\*</sup>, Chuanbin Mao<sup>4,\*</sup>*

<sup>1</sup> State Key Laboratory of Silicon Materials, School of Materials Science and Engineering, Zhejiang University, Hangzhou, 310027, P. R. China

<sup>2</sup> Leicester School of Pharmacy, De Montfort University, Leicester, LE1 9BH, UK.

<sup>3</sup> Department of Mechanical Engineering, University College London, London, WC1E 7JE, UK.

<sup>4</sup> Department of Chemistry & Biochemistry, Stephenson Life Sciences Research Center, University of Oklahoma, 101 Stephenson Parkway, Norman, Oklahoma, 73019-5300, United States

\* Corresponding Authors. E-mail: xiang.li@zju.edu.cn; hgr@zju.edu.cn; cbmao@ou.edu.

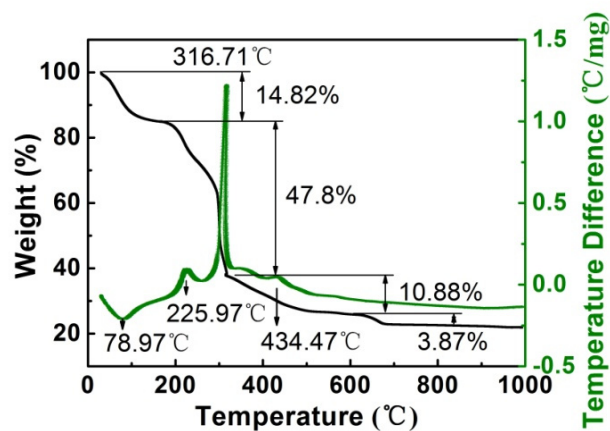

**Figure S1.** TG- DSC curve of the  $\text{CaTiO}_3$ : 1%  $\text{Nd}^{3+}$  nanofibers (Black and green curves refer to TG and DSC spectrum, respectively).

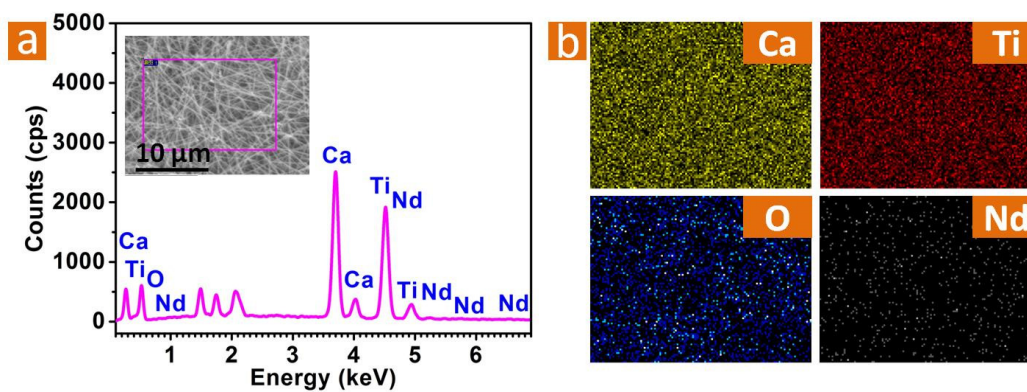

**Figure S2.** (a) EDS and (b) elemental mapping of the  $\text{CaTiO}_3$ : 1%  $\text{Nd}^{3+}$  nanofibers.

**Table S1.** The EDS elemental quantification of  $\text{CaTiO}_3$ : 1%  $\text{Nd}^{3+}$  nanofibers

| Element | Wt %   | Atom % |
|---------|--------|--------|
| Ca      | 24.91  | 15.71  |
| Ti      | 30.70  | 16.20  |
| O       | 42.94  | 67.84  |
| Nd      | 1.46   | 0.26   |
| Total   | 100.00 |        |

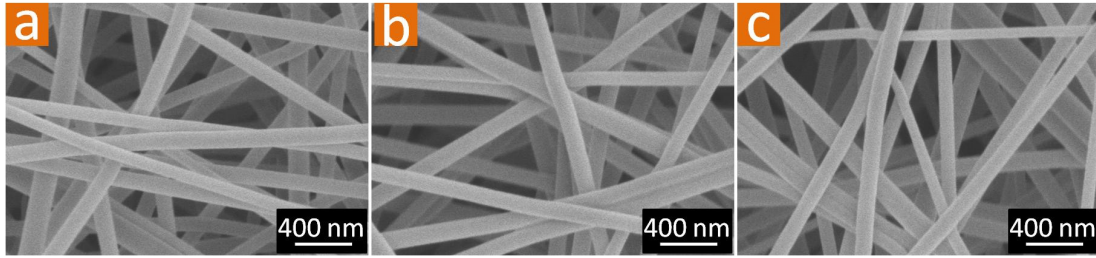

**Figure S3.** SEM images of the as-formed  $\text{CaTiO}_3: 1\% \text{Nd}^{3+}$  precursor nanofibers obtained at different F127/CTO molar ratios: (a) 0, (b) 2.5m, and (c) 5m.

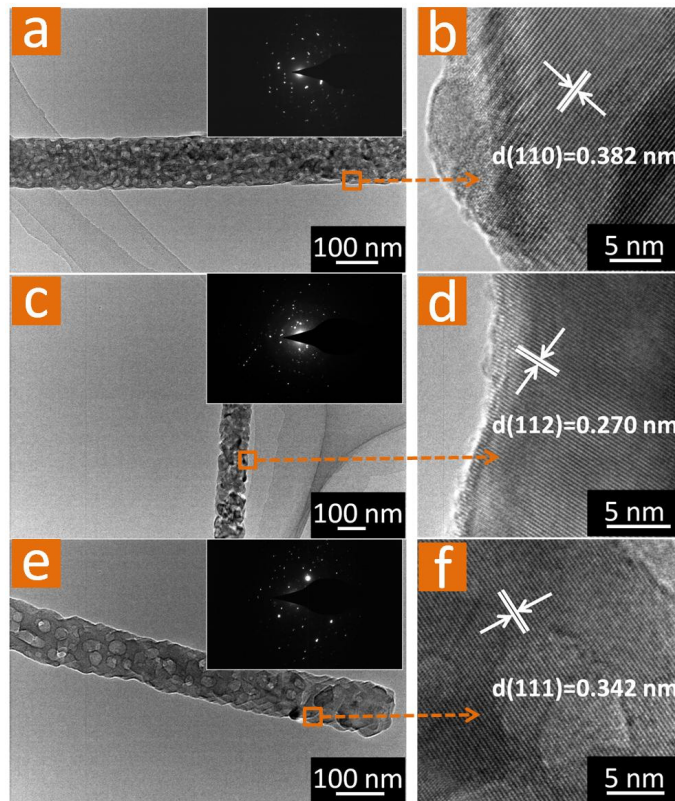

**Figure S4.** TEM and HRTEM images of  $\text{CaTiO}_3: 1\% \text{Nd}^{3+}$  nanofibers obtained at different F127/CTO molar ratios: (a, b) 0, (c, d) 2.5m, and (e, f) 5m.

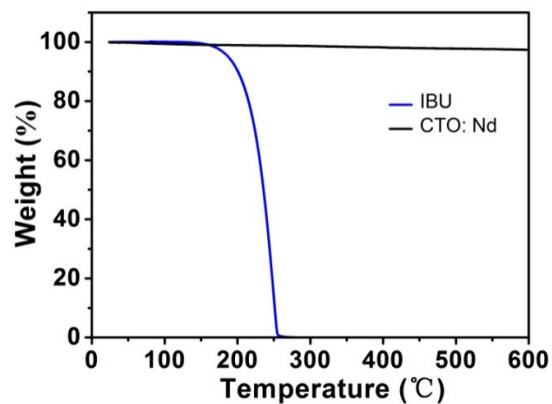

**Figure S5.** TG curve of the CaTiO<sub>3</sub>: 1% Nd<sup>3+</sup> nanofibers and pure IBU.

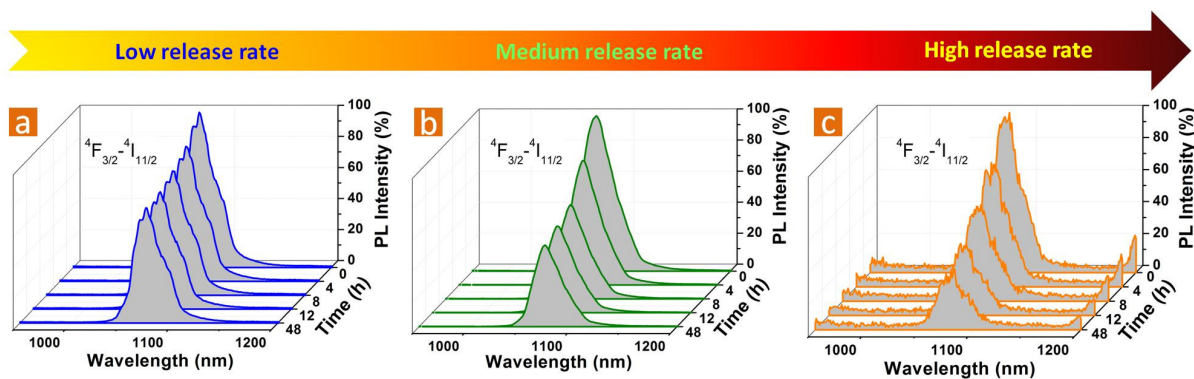

**Figure S6.** PL emission intensity as a function of release time for IBU loaded CaTiO<sub>3</sub>: 1% Nd<sup>3+</sup> nanofibers obtained at different F127/CTO molar ratios: (a) 0, (b) 2.5m, and (c) 5m.

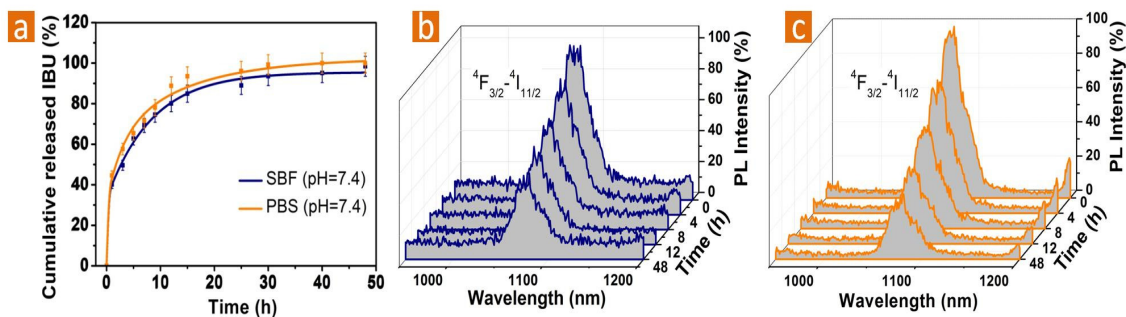

**Figure S7.** Cumulative drug release profiles (a) and the relative photoluminescence emission intensity (b, c) as a function of release time for IBU loaded CaTiO<sub>3</sub>: 1% Nd<sup>3+</sup> nanofibers obtained at F127/CTO molar ratios of 5m in (b) SBF medium and (c) PBS medium.
